# Supplementary material for: Efficient singlet fission in an orthogonal anthracene dimer film
Source: Royal Society of Chemistry journal article supplement (doi:10.1039/d2qm00531j), 2022-01-01
Supplement: d2qm00531j1.pdf [file d2qm00531j1.pdf]

*Supporting Information for*

## **Efficient Singlet Fission in an Orthogonal Anthracene Dimer Film**

Jun Zhou,<sup>†a</sup> Xiangyang Wang,<sup>†a</sup> Weijie Wang,<sup>a</sup> Heyuan Liu,<sup>\*a,c</sup> Tianying Wang,<sup>a</sup>

Xiaojuan Song,<sup>a</sup> Zhi Li,<sup>b</sup> Zhaobin Liu,<sup>b</sup> Yanli Chen,<sup>a</sup> and Xiyou Li<sup>\*a</sup>

### **Content**

|                                                                           |    |
|---------------------------------------------------------------------------|----|
| 1. Crystal structures for 9-PhAn and 9,9'-BiAn .....                      | 2  |
| 2. Comparison of XRD patterns between single crystal and solid film ..... | 4  |
| 3. Fluorescence dynamics of 9-PhAn and 9,9'-BiAn in toluene.....          | 5  |
| 4. <i>fs</i> -TA spectra of 9-PhAn in toluene .....                       | 6  |
| 5. Sensitization experiment of 9-PhAn in solution and solid film .....    | 7  |
| 6. <i>fs</i> -TA spectra of 9,9'-BiAn in toluene.....                     | 8  |
| 7. Sensitization experiment of 9,9'-BiAn in solution and solid film ..... | 9  |
| 8. Comparison of TA spectra between the raw data and fitting data .....   | 10 |
| 9. Geometry and Molecular Orbitals from Calculations .....                | 11 |
| 10. Absorption and fluorescence spectra of 9,9'-BiAn in solution and PMMA | 13 |
| 11. Triplet yield determination .....                                     | 14 |

## 1. Crystal structures for 9-PhAn and 9,9'-BiAn

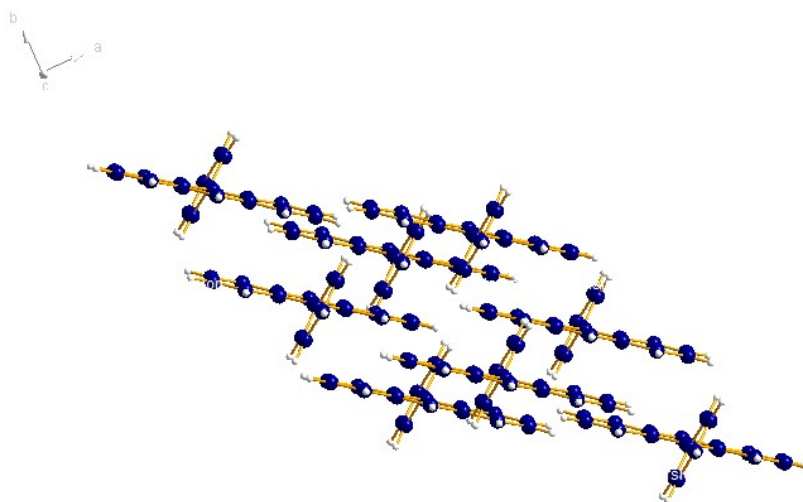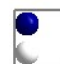

**Figure S1.** Crystal structure of 9-PhAn downloaded from the Cambridge Crystallographic Data Centre.<sup>1</sup>

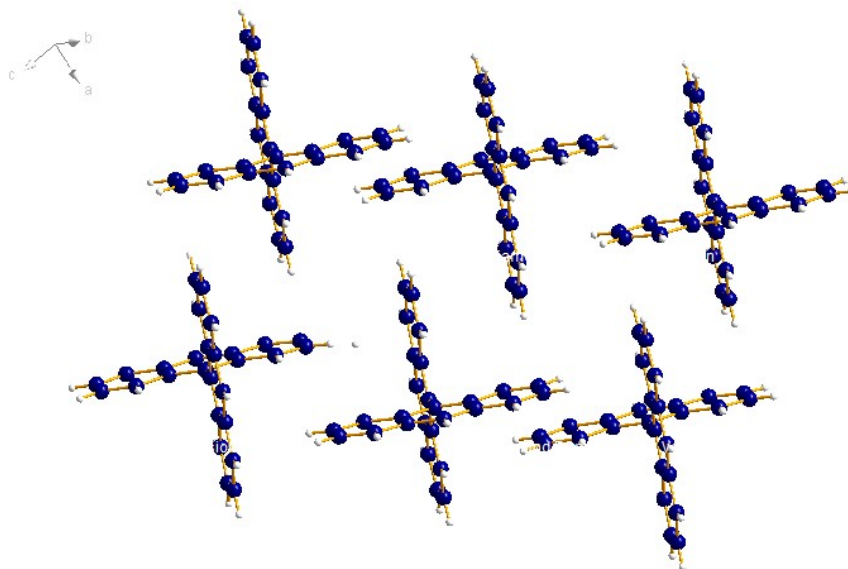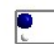

**Figure S2.** Crystal structure of 9,9'-BiAn.

**Table S1.** Crystallographic parameters for 9-PhAn and 9,9'-BiAn crystals.

|                                           | 9-PhAn                                                        | 9,9'-BiAn                                                     |
|-------------------------------------------|---------------------------------------------------------------|---------------------------------------------------------------|
| Empirical                                 | C <sub>20</sub> H <sub>14</sub>                               | C <sub>35</sub> H <sub>26</sub>                               |
| Formula                                   | 254.310                                                       | 446.56                                                        |
| Temperature/K                             | 150.00                                                        | 293                                                           |
| Crystal                                   | triclinic                                                     | triclinic                                                     |
| Space                                     | P-1                                                           | P-1                                                           |
| a/Å                                       | 6.247                                                         | 10.5976                                                       |
| b/Å                                       | 10.259                                                        | 11.4038                                                       |
| c/Å                                       | 10.779                                                        | 11.6338                                                       |
| $\alpha$ /°                               | 84.94                                                         | 63.190                                                        |
| $\beta$ /°                                | 76.39                                                         | 81.467                                                        |
| $\gamma$ /°                               | 77.39                                                         | 85.013                                                        |
| Volume/Å <sup>3</sup>                     | 654.7                                                         | 1240.64                                                       |
| Z                                         | 2                                                             | 2                                                             |
| $\rho$ calc mg/cm <sup>3</sup>            | 1.290                                                         | 1.195                                                         |
| $\mu$ /mm <sup>-1</sup>                   | 0.073                                                         | 1.322                                                         |
| F(000)                                    | 268.0                                                         | 472                                                           |
| 2 $\theta$ range for data collection      | 6.648 to 141.08                                               | 3.178 to 51.928                                               |
| Reflections collected                     | 3981                                                          | 9179                                                          |
| Independent reflections                   | 2241 [R <sub>int</sub> = 0.0136, R <sub>sigma</sub> = 0.0186] | 5169 [R <sub>int</sub> = 0.0953, R <sub>sigma</sub> = 0.1525] |
| Data/restraints/parameters                | 2241/0/181                                                    | 5169/0/521                                                    |
| Goodness-of-fit on F <sup>2</sup>         | 1.038                                                         | 1.303                                                         |
| Final R indexes [I >= 2 $\sigma$ (I)]     | R <sub>1</sub> = 0.1195, wR <sub>2</sub> = 0.2975             | R <sub>1</sub> = 0.2047, wR <sub>2</sub> = 0.4605             |
| Final R indexes [all data]                | R <sub>1</sub> = 0.1213, wR <sub>2</sub> = 0.3042             | R <sub>1</sub> = 0.3031, wR <sub>2</sub> = 0.5401             |
| Largest diff. peak/hole /eÅ <sup>-3</sup> | 0.56/-0.46                                                    | 1.00/-0.54                                                    |

## 2. Comparison of XRD patterns between single crystal and solid film

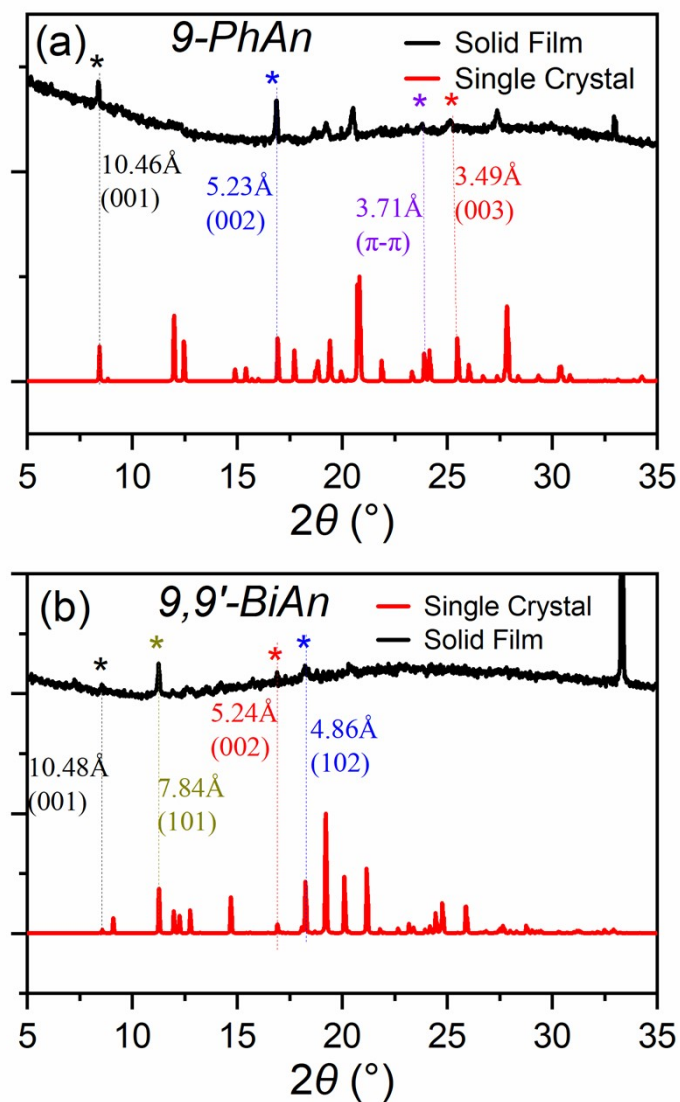

**Figure S3.** Comparison of XRD patterns between single crystal and solid film.

### 3. Fluorescence dynamics of 9-PhAn and 9,9'-BiAn in toluene

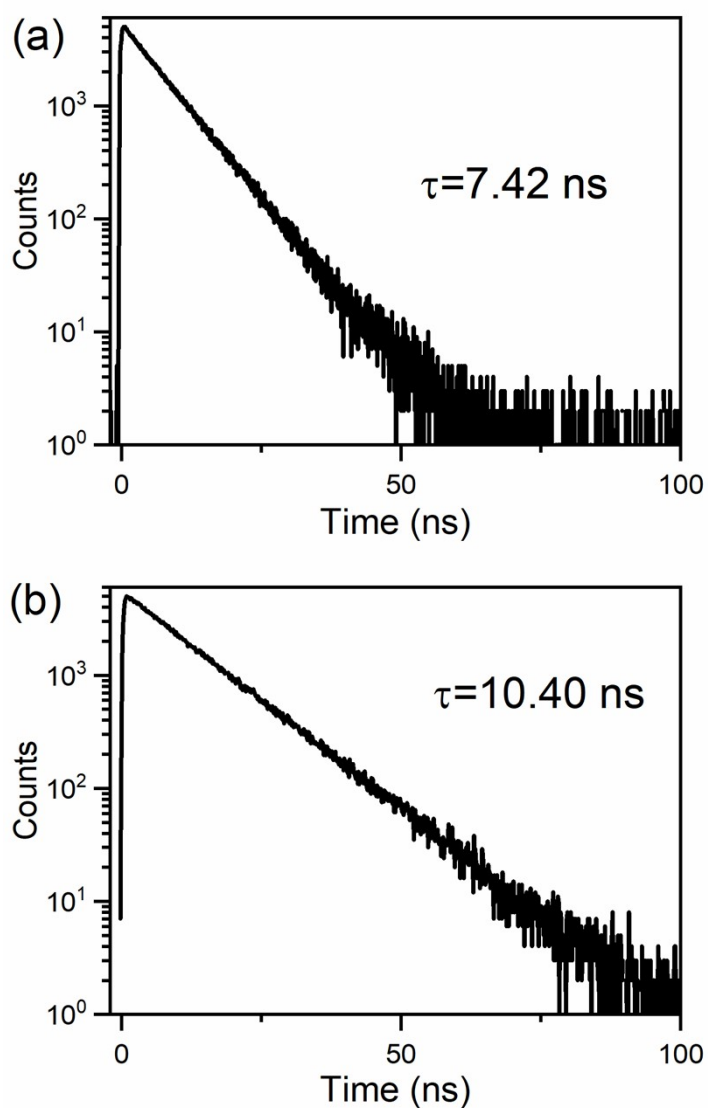

**Figure S4.** Fluorescence dynamics of 9-PhAn (a) and 9,9'-BiAn (b) monitored at the maximum emission peak in toluene.

#### 4. *fs*-TA spectra of 9-PhAn in toluene

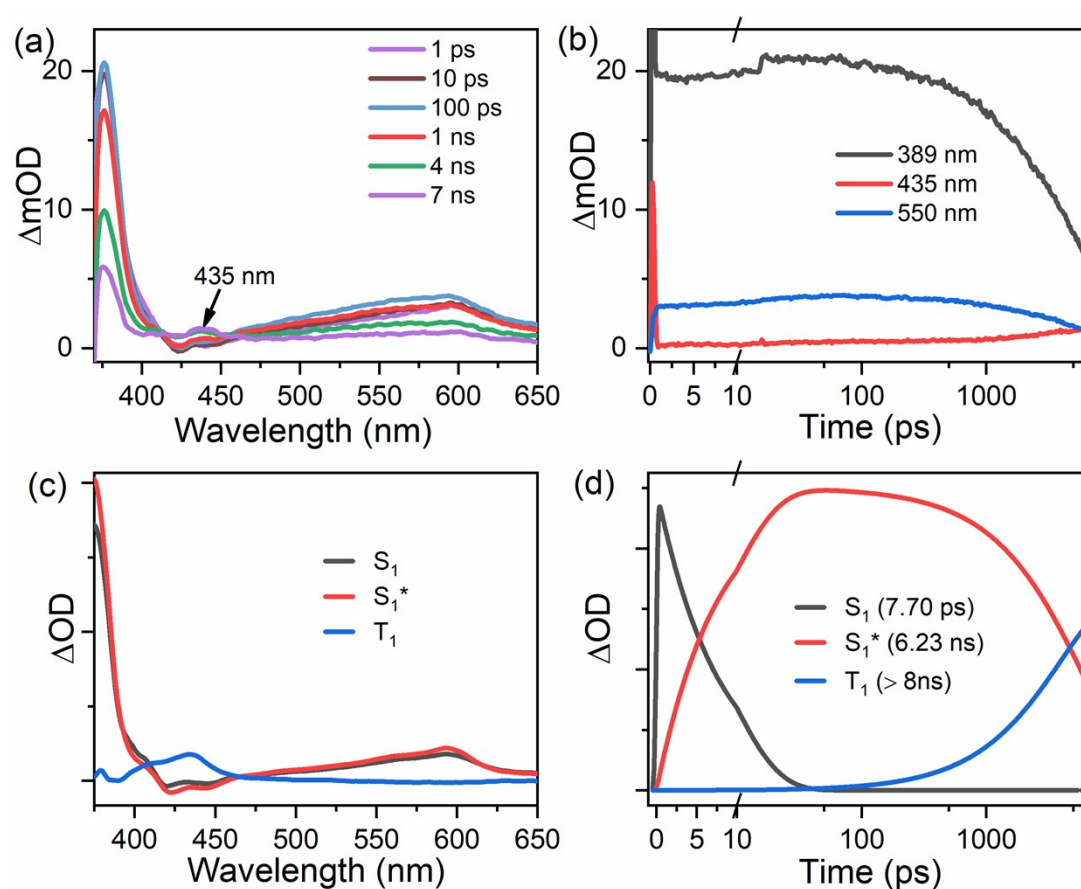

**Figure S5.** (a) *fs*-TA spectra of 9-PhAn in toluene. (b) Single-wavelength dynamics probed at different wavelengths. Species-associated spectra (c) and dynamics (d) obtained from global analysis.

In toluene, after photoexcitation, the TA spectra of 9-PhAn show immediately two photo-induced bleaching (PIB) bands corresponding to stimulated emission (SE) at 424 and 440 nm, and two excited-state absorption (ESA) associated to the singlet ( $S_1$ ) state at 376 nm and 470-650 nm. As the time increases, the  $S_1$  absorption intensity first increases slightly (Figure S5a), which should be caused by vibrational cooling and structural relaxation.<sup>2</sup> Then, the relaxed  $S_1$  state ( $S_1^*$ ) decays gradually with a time constant of 6.23 ns (Figure S5c and S5d) and a small band of triplet ( $T_1$ ) absorption is observed at 435 nm (this assignment is confirmed by the sensitization experiment. Figure S6). This slow conversion should be originated from intersystem crossing (ISC).

## 5. Sensitization experiment of 9-PhAn in solution and solid film

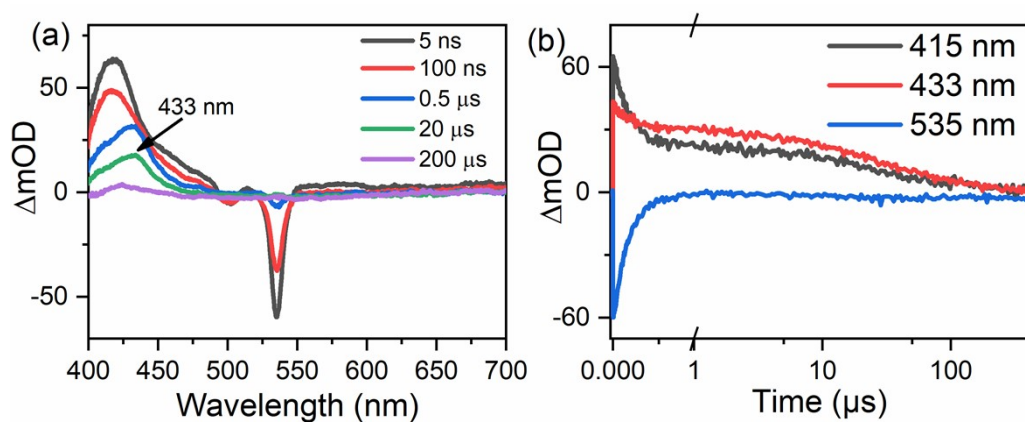

**Figure S6.** (a) *ns*-TA spectra for a mixture of 9-PhAn and PtOEP in toluene excited at 535 nm. (b) Single-wavelength dynamics probed at different wavelengths.

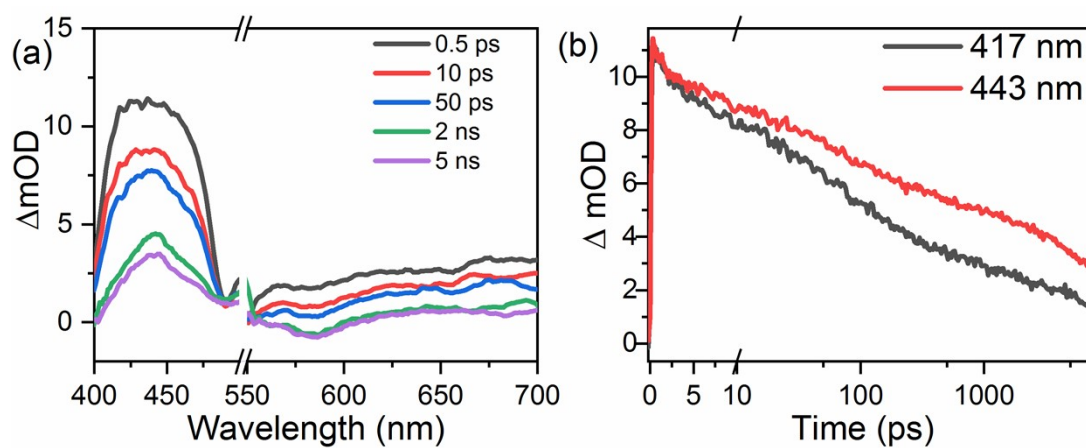

**Figure S7.** (a) *fs*-TA spectra for a doped film of 9-PhAn and PtOEP excited at 535 nm. (b) Single-wavelength dynamics probed at different wavelengths.

## 6. *fs*-TA spectra of 9,9'-BiAn in toluene

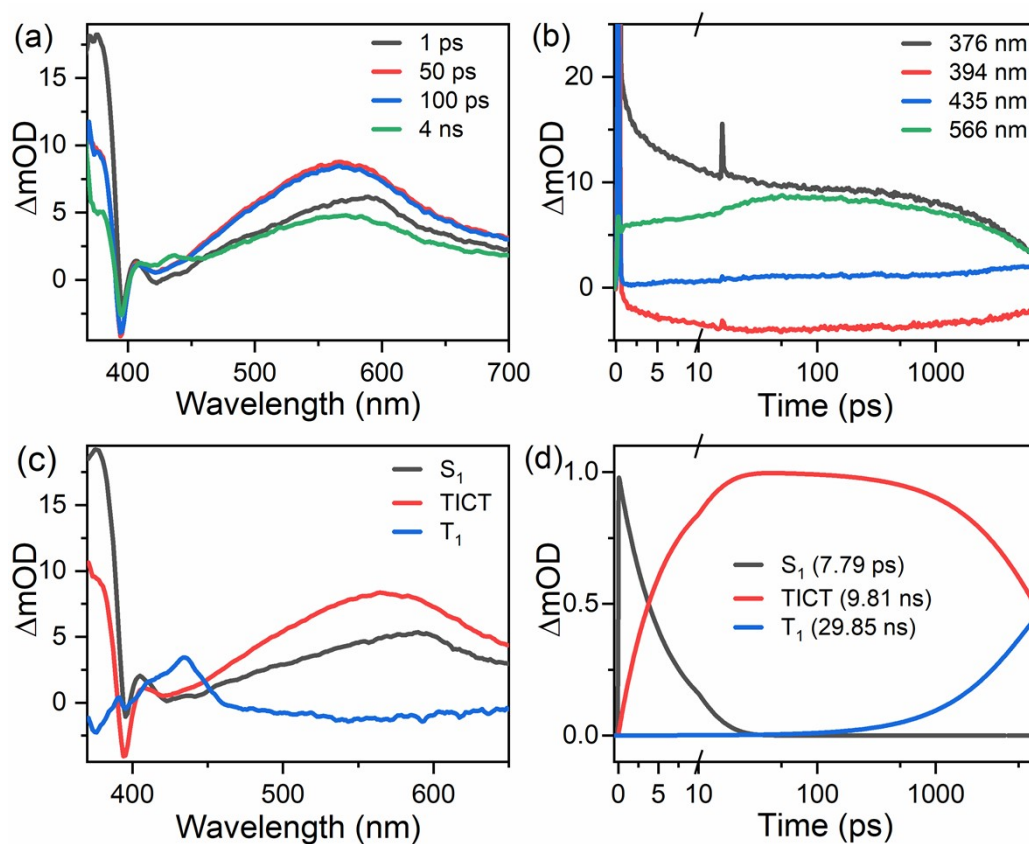

**Figure S8.** (a) *fs*-TA spectra of 9,9'-BiAn in toluene. (b) Single-wavelength dynamics probed at different wavelengths. Species-associated spectra (c) and dynamics (d) obtained from global analysis.

Upon photoexcitation, TA spectra of 9,9'-BiAn in toluene display immediately the GSB band at 394 nm, and the  $S_1$  absorption at 376 nm and 450-650 nm (Figure S8a). With the decrease of  $S_1$  absorption intensity at 376 nm, the initial  $S_1$  absorption centered at 588 nm is blue-shifted to 569 nm along with an intensity increase (Figure S8a-S8b). This is ascribed to the formation of the TICT state and its generation time is 7.94 ps based on the global analysis (Figure S8c-S8d).



## 7. Sensitization experiment of 9,9'-BiAn in solution and solid film

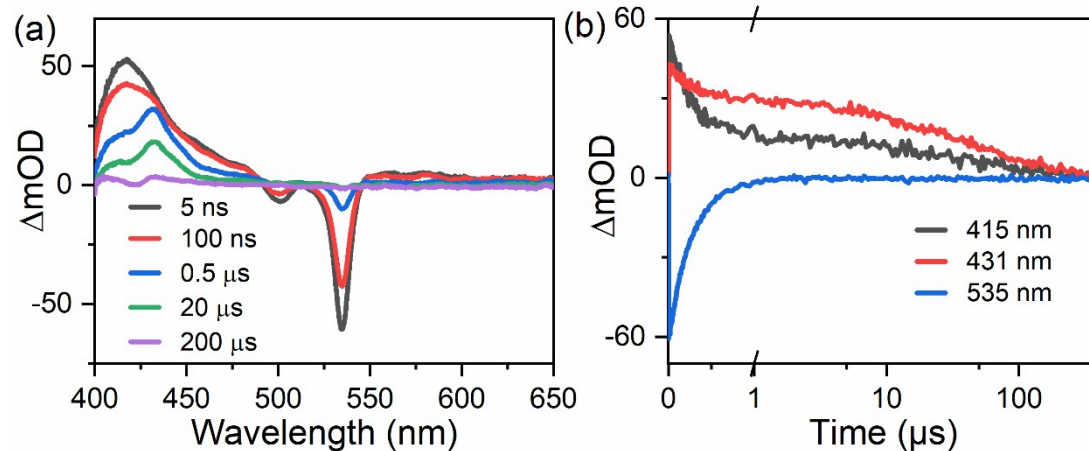

**Figure S9.** (a) *fs*-TA spectra for a mixture of 9,9'-BiAn and PtOEP excited at 535 nm in toluene. (b) Single-wavelength dynamics probed at different wavelengths.

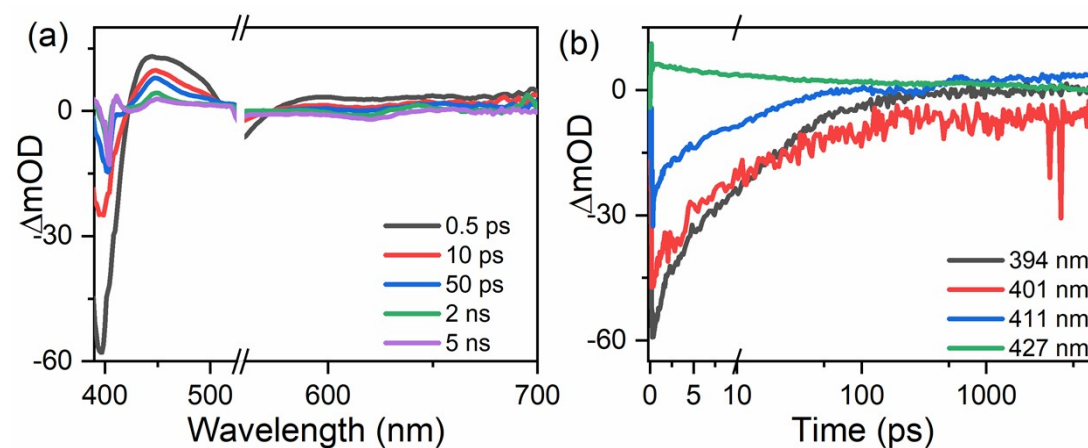

**Figure S10.** (a) *fs*-TA spectra for a doped film of 9,9'-BiAn and PtOEP excited at 535 nm. (b) Single-wavelength dynamics probed at different wavelengths.

## 8. Comparison of TA spectra between the raw data and fitting data

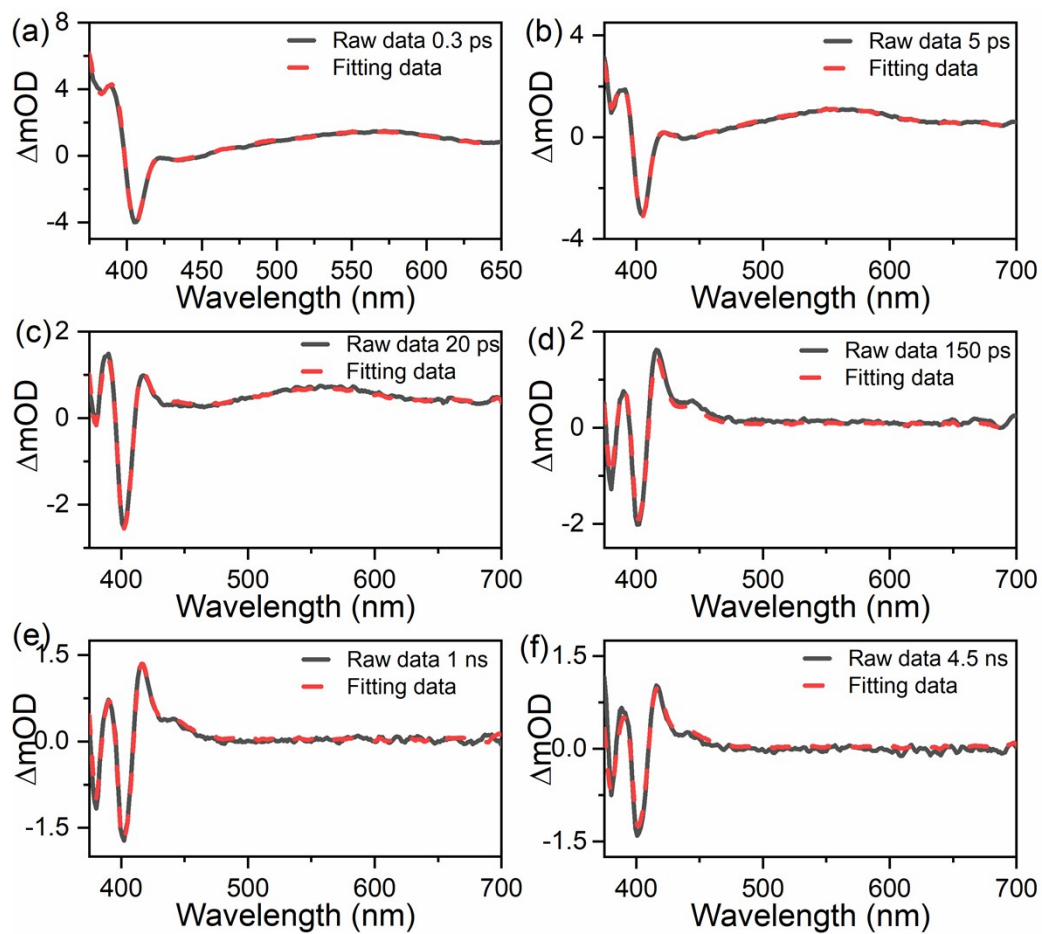

**Figure S11.** Comparison of TA spectra of 9,9'-BiAn film between the raw data and the fitting data using global analysis.

9. HOMO and LUMO distributions of 9-PhAn and 9,9'-BiAn

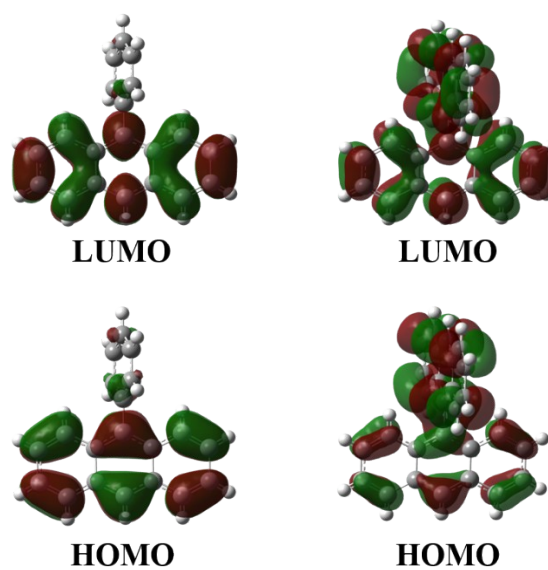

**Figure S12** Lowest unoccupied molecular orbitals (LUMO) and highest occupied molecular orbitals (HOMO) of 9-PhAn and 9,9'-BiAn.

**Table S2.** Singlet and triplet energy of 9-PhAn and 9,9'-BiAn.

|                     | 9-PhAn | 9,9'-BiAn |
|---------------------|--------|-----------|
| S <sub>1</sub> (eV) | 3.66   | 3.61      |
| T <sub>1</sub> (eV) | 1.86   | 1.83      |

## 10. Absorption and fluorescence spectra of 9,9'-BiAn in solution and PMMA

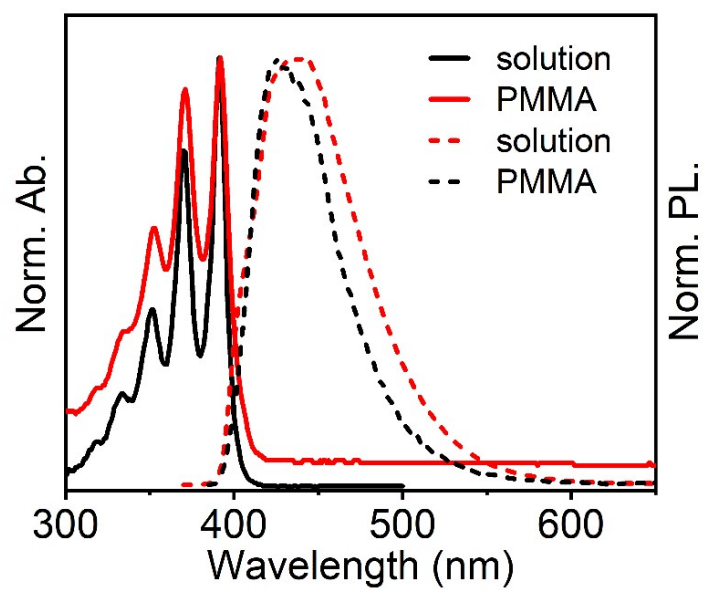

**Figure 13** Absorption (solid line) and fluorescence (dash line) spectra of 9,9'-BiAn in toluene black line and PMMA (red line).

## 11. Triplet yield determination

The triplet yield was determined using the ground-state bleaching method according to the previous report.<sup>3,4</sup> The initial molecule concentration is assumed to be unity. The TA spectrum of an early time trace (0.3 ps) after photoexcitation was selected to represent the  $S_1$  spectra for 9,9'-BiAn and 9-PhAn films. The  $S_1$  concentration at the beginning is assumed to be  $C_1$  whereas the  $T_1$  concentration remains nearly 0.

The  $S_0$  concentration ( $C_t(S_0)$ ) at any time can be calculated following equation (1):

$$C_{t1}(S_0) = 1 - C_{t1}(S_1) - C_{t1}(T_1) \quad (1)$$

$$\begin{aligned} \Delta C_{t1}(S_0) &= C_{t1}(S_0) - C_0(S_0) = 1 - C_{t1}(S_1) - C_{t1}(T_1) - 1 = 1 - C_1 - 0 - 1 \\ &= -C_{t1}(S_1) \end{aligned} \quad (2)$$

The TA spectra at 325 ps and 460 ps were selected to represent the  $T_1$  spectra of 9,9'-BiAn and 9-PhAn films, respectively. At these times, the  $S_1$  state has decayed completely meanwhile the  $T_1$  state was formed according to the species-associated dynamics obtained global analysis (Figure 4d and 5d in the main text).

$$C_{t2}(S_0) = 1 - C_{t2}(S_1) - C_{t2}(T_1) \quad (3)$$

$$\begin{aligned} \Delta C_{t2}(S_0) &= C_{t2}(S_0) - C_0(S_0) = 1 - C_{t2}(S_1) - C_{t2}(T_1) - 1 = 1 - 0 - C_{t2}(T_1) - 1 \\ &= -C_{t2}(T_1) \end{aligned} \quad (4)$$

The triplet quantum yield can be calculated by equation (5):

$$\Phi_T = \frac{C_{t2}(T_1)}{C_{t1}(S_1)} = \frac{\Delta C_{t2}(S_0)}{\Delta C_{t1}(S_0)} = \frac{GSB(t_2)}{GSB(t_1)} \quad (5)$$

The TA spectra show the superposition of GSB,  $S_1$  absorption or  $T_1$  absorption. Thus,

proper substraction of the scaled GSB spectrum can reproduce the pure  $S_0$ ,  $S_1$ ,  $T_1$  spectra.

The specific operation is that only enough ground state absorption is added to the transient trace in order to remove the effect of the GSB band on the absorption (Figure S12 and S13). Therefore, the triplet yields of 9,9'-BiAn and 9-PhAn films can be determined.

For 9,9'-BiAn film:

$$\Phi_T = \frac{GSB(t2)}{GSB(t1)} = \frac{0.00945}{0.00575} = 164.3\% \pm 10\%$$

For 9-PhAn film:

$$\Phi_T = \frac{GSB(t2)}{GSB(t1)} = \frac{0.00329}{0.00735} = 44.8\% \pm 15\%$$

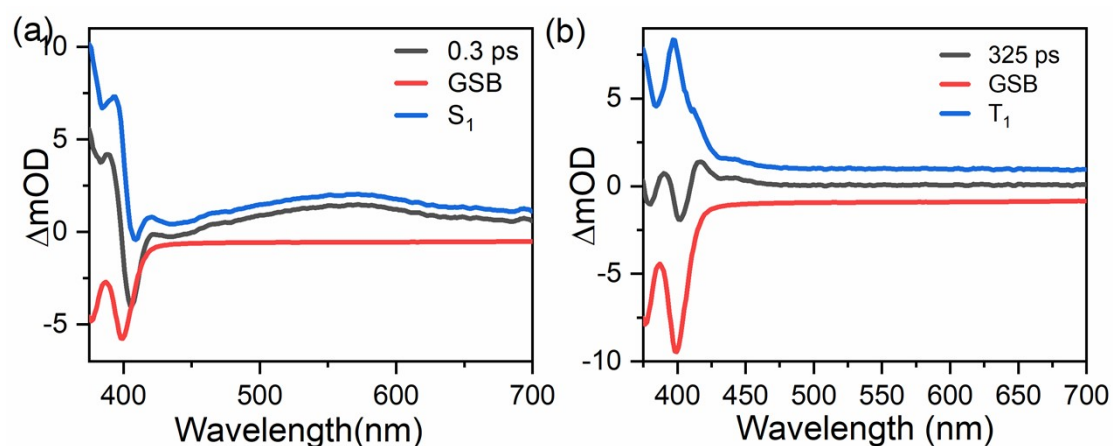

**Figure S14.** TA spectra and substraction of the scaled steady state absorption spectra and resulting reconstructed absorption spectra of the pure singlet state (a) and triplet state (b) of 9,9'-BiAn film.

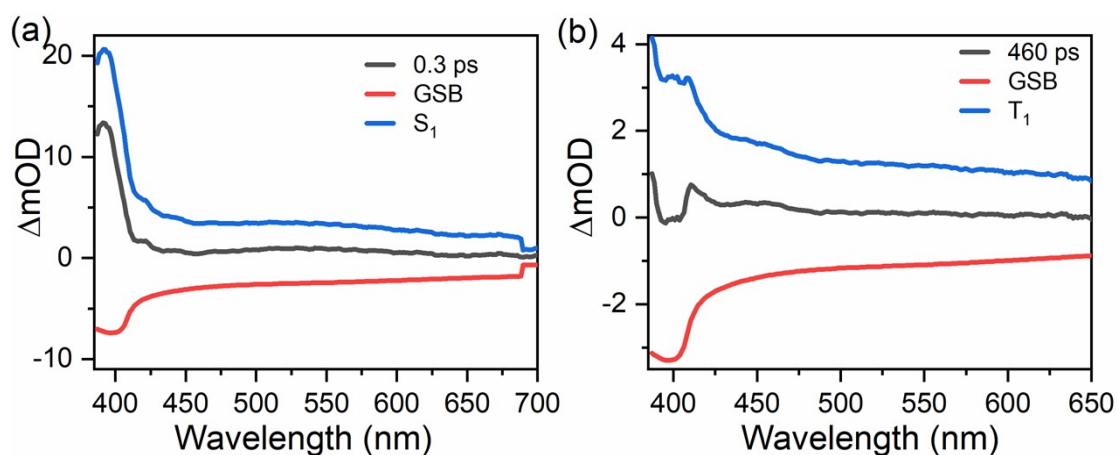

**Figure S15.** TA spectra and subtraction of the scaled steady state absorption spectra and resulting reconstructed absorption spectra of the pure singlet state (a) and triplet state (b) of 9-PhAn film.

### Reference

- 1 H. Iwahara, T. Kushida and S. Yamaguchi, A planarized 9-phenylanthracene: a simple electron-donating building block for fluorescent materials, *Chem. Commun.*, 2016, **52**, 1124-1127.
- 2 B. Manna, A. Nandi and R. Ghosh, Ultrafast Singlet Exciton Fission Dynamics in 9,10-Bis(phenylethynyl)anthracene Nanoaggregates and Thin Films, *J. Phys. Chem. C*, 2018, **122**, 21047–21055.
- 3 Y. Wu, K. Liu, H. Liu, Y. Zhang, H. Zhang, J. Yao, H. Fu, Impact of Intermolecular Distance on Singlet Fission in a Series of TIPS Pentacene Compounds, *J. Phys. Chem. Lett.* 2014, **5**, 3451-3455.
- 4 E.A. Margulies, Y.-L. Wu, P. Gawel, S.A. Miller, L.E. Shoer, R.D. Schaller, F. Diederich and M.R. Wasielewski, Sub-Picosecond Singlet Exciton Fission in Cyano-Substituted Diaryltetracenes. *Angew. Chem. Int. Ed.* 2015, **54**, 8679-8683.
